# Supplementary material
Source: PubMed Central journal article supplement (PMC3032653)

**Figure 1a**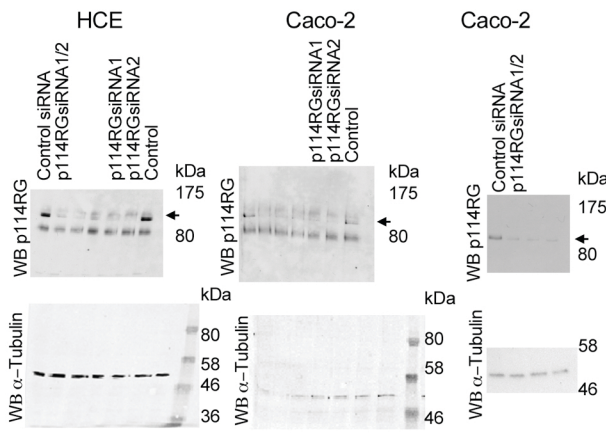**Figure 2a**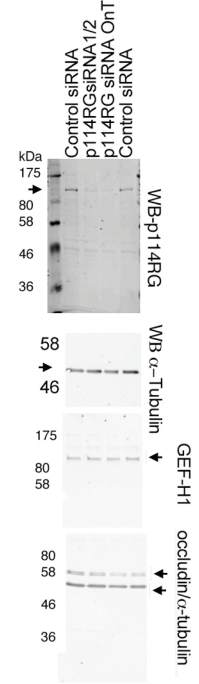**Figure 2d**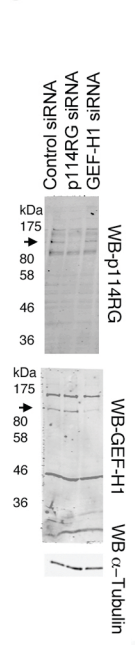**Figure S2b**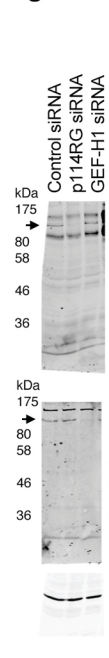**Figure S2e**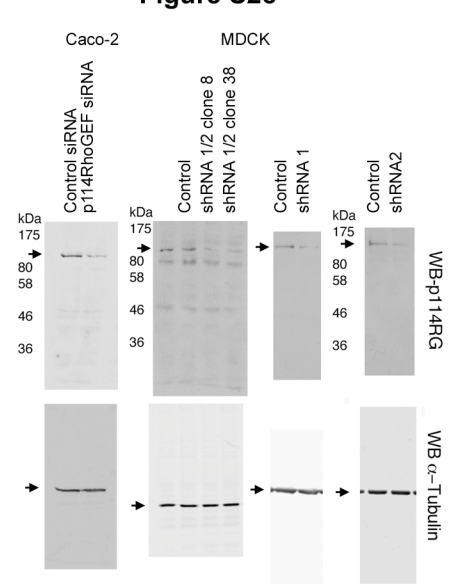**Figure 5 a**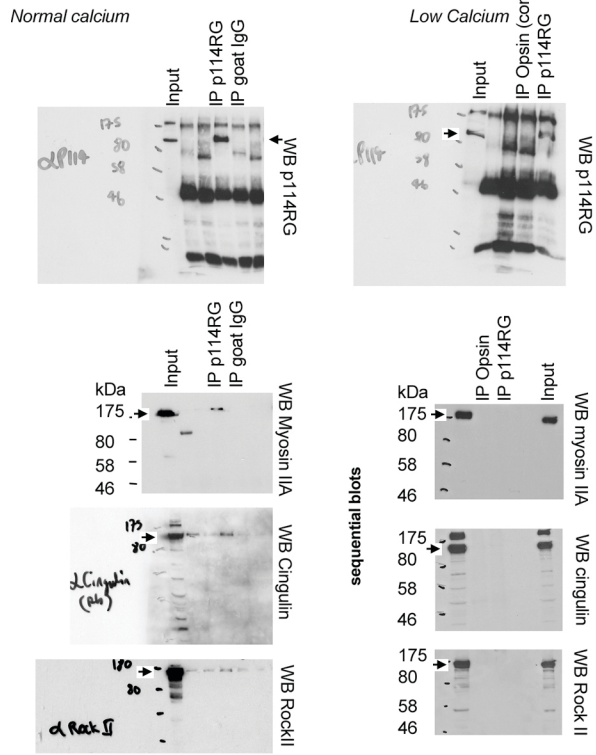**Figure 5 b**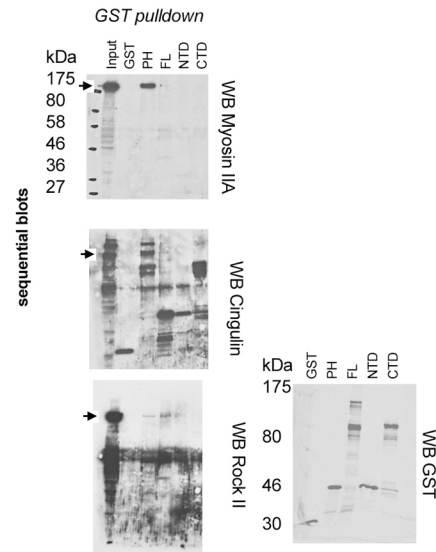**Figure 5 c**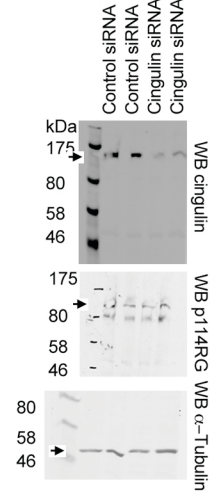**Figure S4b**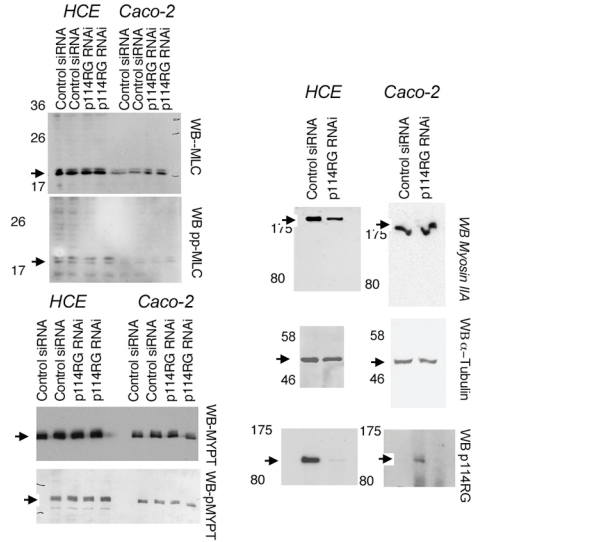**Figure S4c**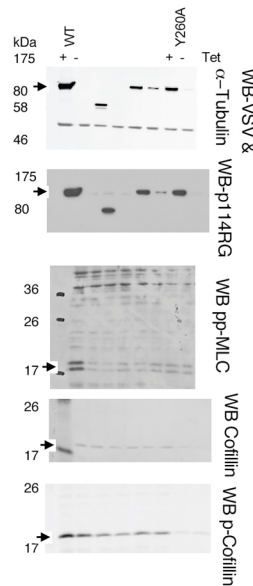**Figure S5a**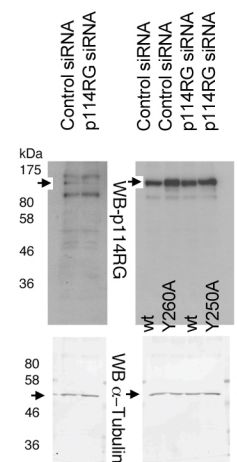**Figure S6a**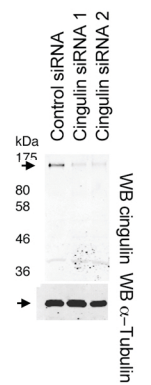

Supplement: NIHMS33680-supplement-2.pdf [file NIHMS33680-supplement-2.pdf]
